# Supplementary material for: Structure and magnetic characterization of some bicompartmental [N6O2] divalent metal(ii) complexes using bis(phenolato) ligands bearing two pendant bis(pyridyl) amine arms
Source: Royal Society of Chemistry journal article supplement (doi:10.1039/d3nj02380j), 2023-01-01
Supplement: d3nj02380j1.pdf [file d3nj02380j1.pdf]

## Electronic Supplementary Information (ESI)

### Structure and magnetic characterization of bicompartamental [N6O2] divalent metal(II) complexes of bis(phenolato) ligand bearing two pendant bis(pyridyl) amine arms<sup>†</sup>

Franz A. Mautner <sup>\*a</sup>, Roland C. Fischer <sup>b</sup>, Ana Torvisco <sup>b</sup>, Kai Nakashima <sup>c</sup>, Makoto Handa <sup>c</sup>, Masahiro Mikuriya <sup>d</sup>, Nahed M. H. Salem <sup>e</sup>, Gabriel J. Overby <sup>f</sup>, Madison R. Maier <sup>f</sup>, Febee R. Louka <sup>e</sup> and Salah S. Massoud <sup>\*ef</sup>

---

<sup>a</sup> *Institut für Physikalische and Theoretische Chemie, Technische Universität Graz, Stremayrgasse 9/II, A-8010, Graz, Austria*

<sup>b</sup> *Institut für Anorganische Chemie, Technische Universität Graz, Stremayrgasse 9, A-8010 Graz, Austria*

<sup>c</sup> *Department of Chemistry, Interdisciplinary Graduate School of Science and Engineering, Shimane University, 1060 Nishikawatsu, Matsue 690-8504 Japan*

<sup>d</sup> *Department of Applied Chemistry for Environment, School of Biological and Environmental Sciences, Kwansai Gakuin University, 1 Gakuen Uegahara, Sanda 669-1330 Japan*

<sup>e</sup> *Department of Chemistry, Faculty of Science, Alexandria University, Moharam Bey, 21511 Alexandria, Egypt*

<sup>f</sup> *Department of Chemistry, University of Louisiana at Lafayette, P.O. Box 43700 Lafayette, LA 70504-4370, USA*

### Table of Contents

| <u>Title</u>                                                                                                                                 | <u>Page #</u> |
|----------------------------------------------------------------------------------------------------------------------------------------------|---------------|
| <b>Fig. S1</b> ESI-MS of H <sub>2</sub> L in methanol                                                                                        | 2             |
| <b>Fig. S2</b> <sup>1</sup> H (top) and <sup>13</sup> C (bottom) NMR spectra of H <sub>2</sub> L in d <sub>6</sub> -DMSO                     | 3             |
| <b>Fig. S3-S9</b> ESI-MS of <b>2-8</b> compounds, respectively in acetonitrile                                                               | 4-7           |
| <b>Table S1</b> Selected bond distances (Å) and bond angles (°)                                                                              | 8             |
| <b>Table S2</b> Possible hydrogen bonds.                                                                                                     | 10            |
| <b>Table S3</b> Non-covalent ring-ring interactions.                                                                                         | 11            |
| <b>Fig. S10-S11</b> Packing plots of <b>1</b> and <b>4</b> , respectively.                                                                   | 12            |
| <b>Fig. S12-S13</b> Packing plots of <b>5</b> and <b>6</b> , respectively.                                                                   | 13            |
| <b>Fig. S14a-S14b</b> Perspective views of Cu <sub>1</sub> -Cu <sub>2</sub> and Cu <sub>2</sub> -Cu <sub>4</sub> dimeric units in <b>2</b> . | 14            |

---

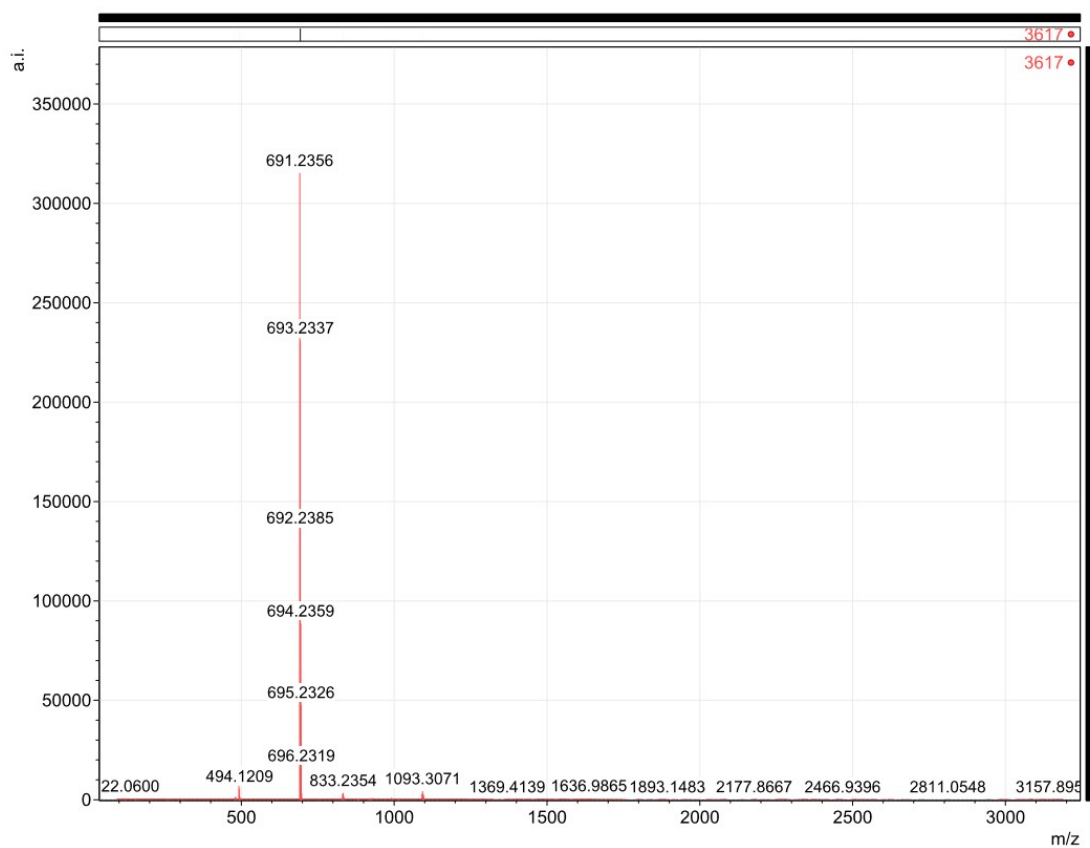

Fig. S1 ESI-MS of H<sub>2</sub>L in methanol

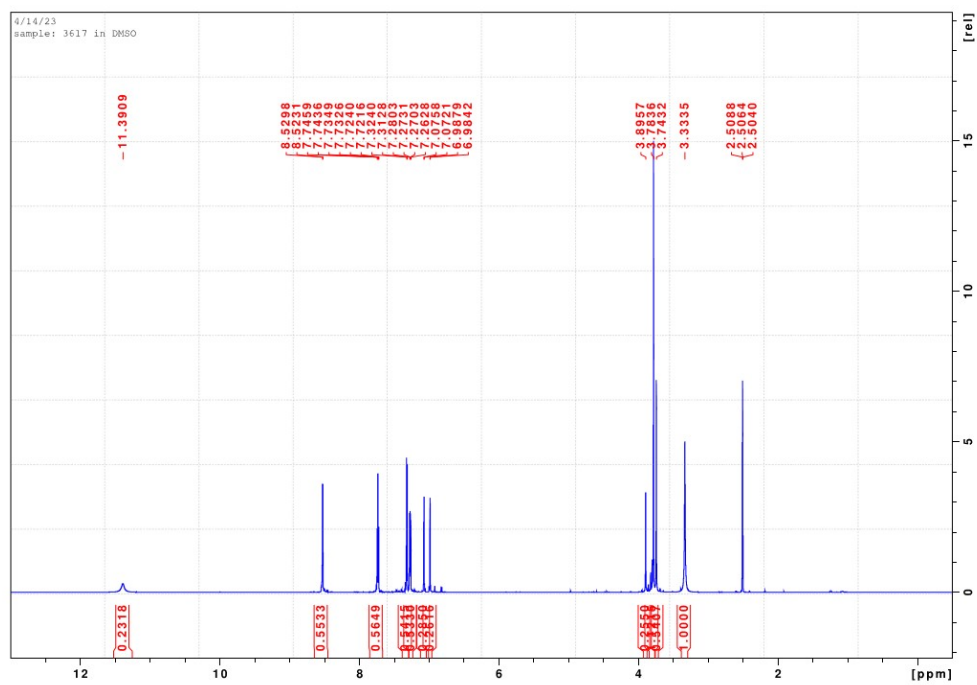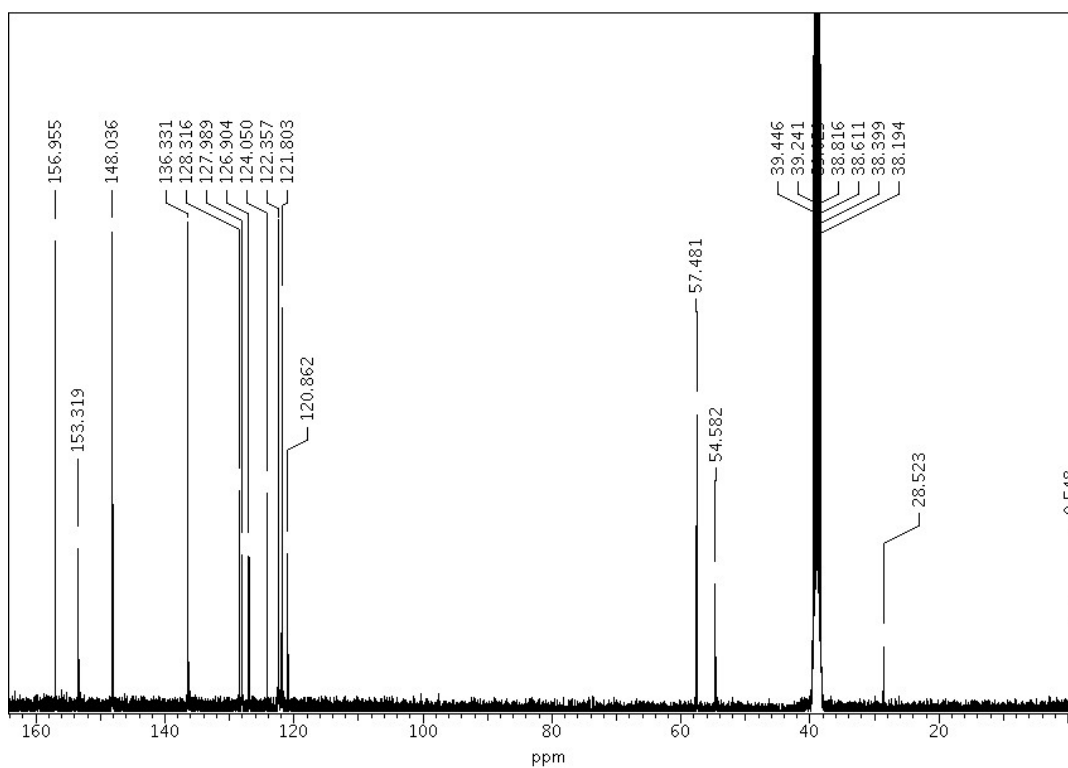

**Fig. S2**  $^1\text{H}$  (top) and  $^{13}\text{C}$  (bottom) NMR spectra of  $\text{H}_2\text{L}$  in  $d_6\text{-DMSO}$

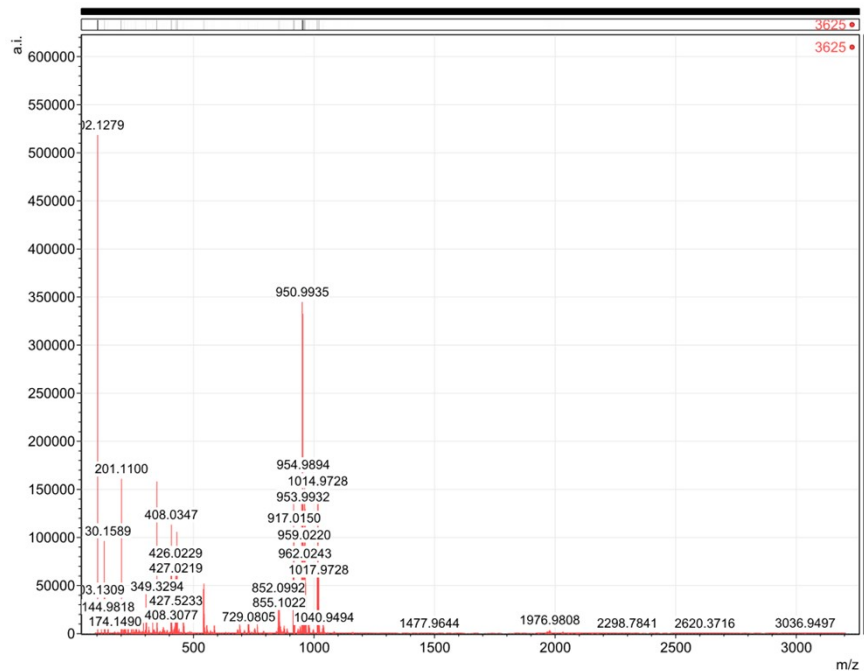

Fig. S3. ESI-MS of 2 in acetonitrile

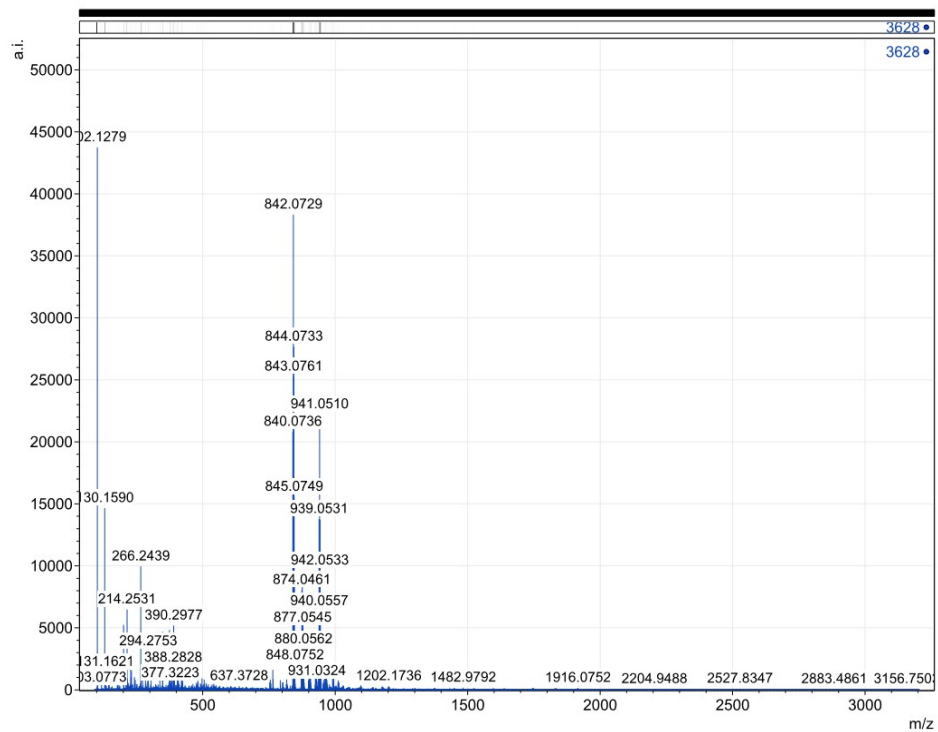

Fig. S4 ESI-MS of 3 in acetonitrile

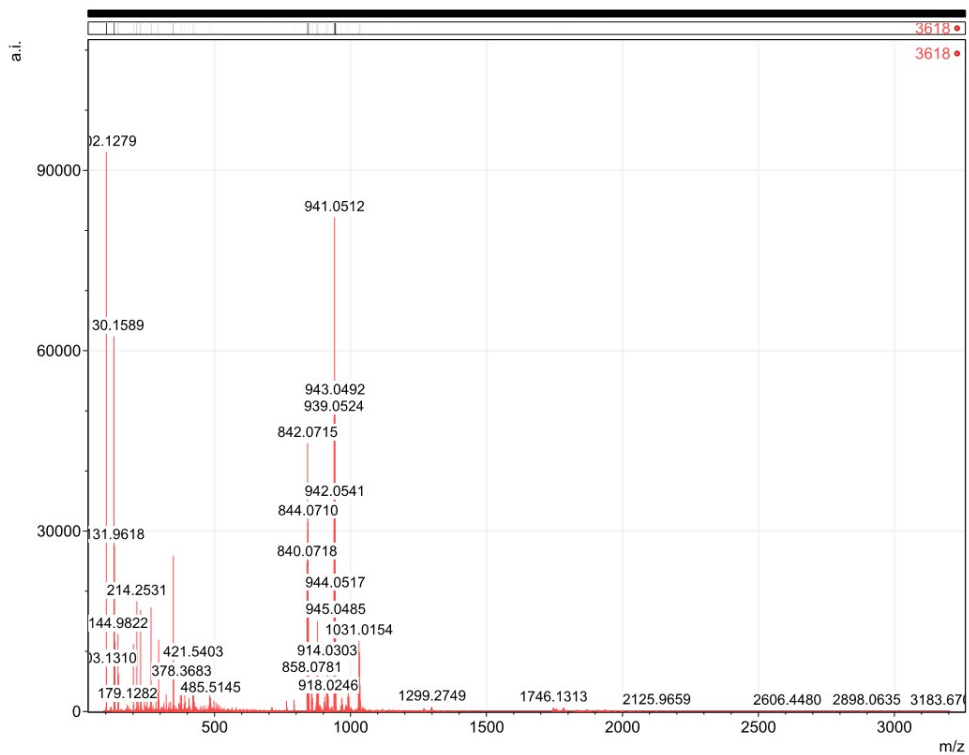

Fig. S5 ESI-MS of 4 in acetonitrile

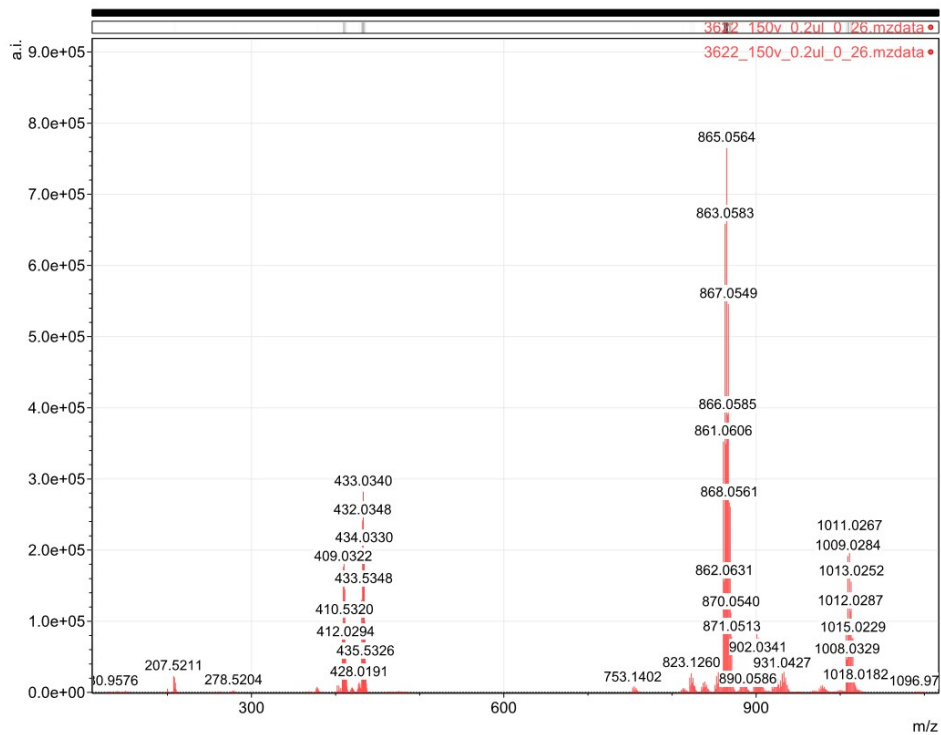

Fig. S6 ESI-MS of 5 in acetonitrile

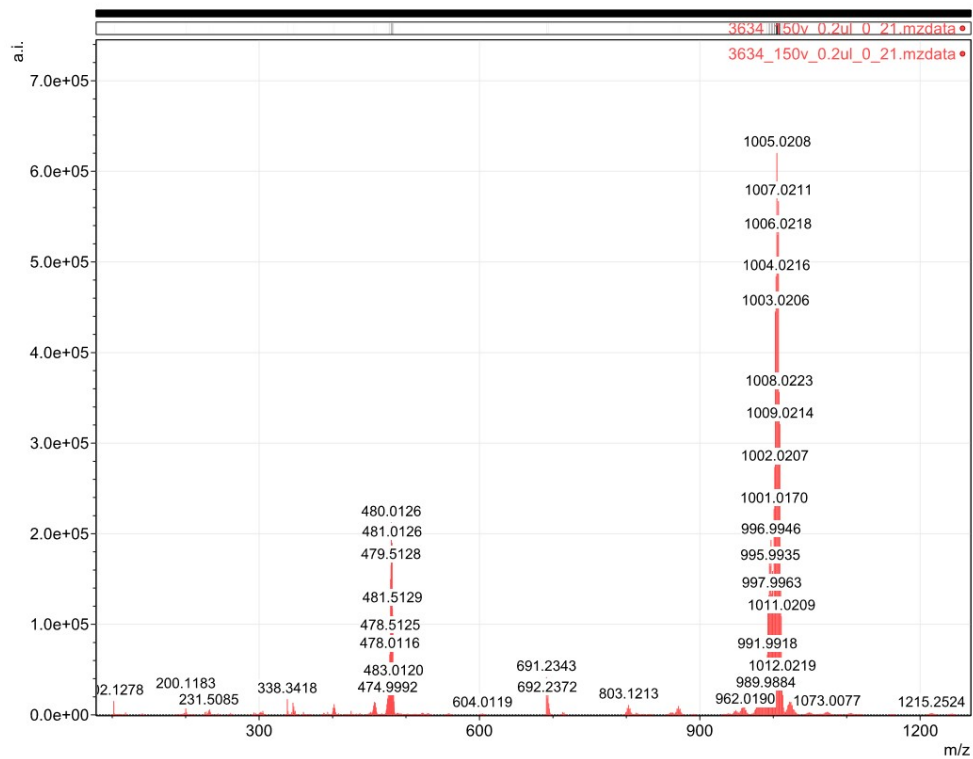

Fig. S7 ESI-MS of 6 in acetonitrile

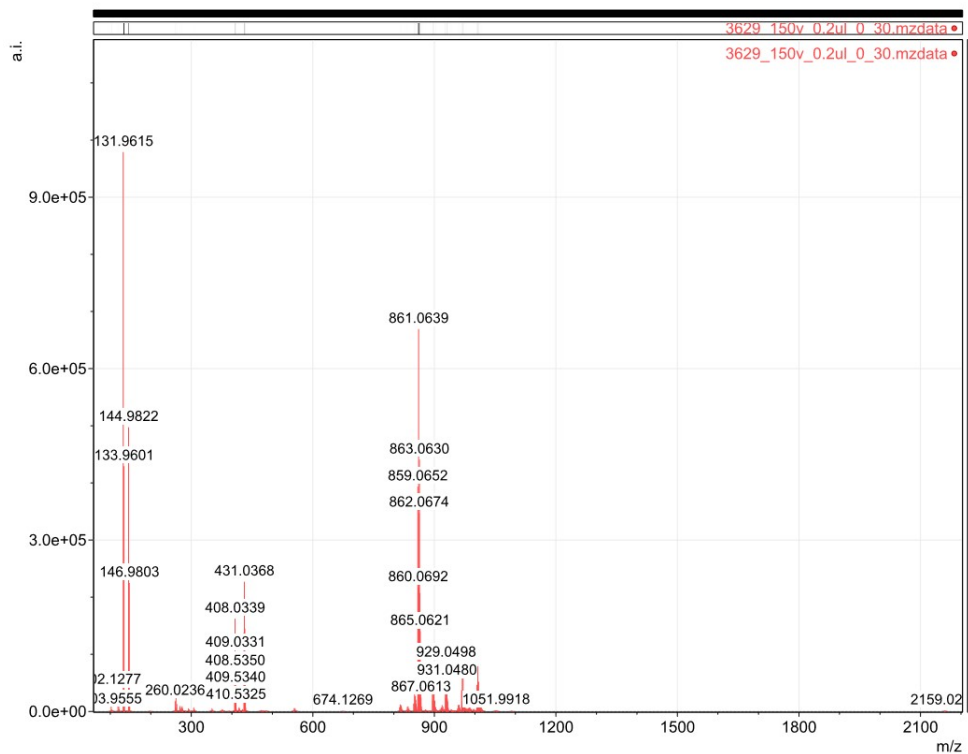

Fig. S8 ESI-MS of 7 in acetonitrile

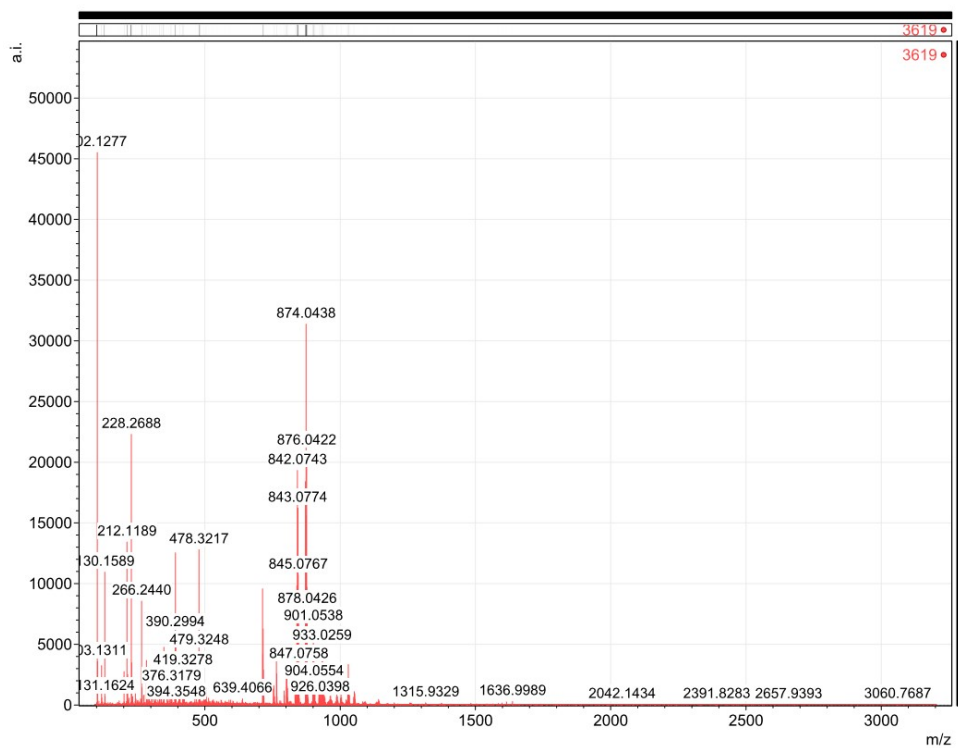

**Fig. S9** ESI-MS of **8** in acetonitrile

**Table S1** Selected bond distances (Å) and bond angles (°).

|            |          |            |           |
|------------|----------|------------|-----------|
| Compound 1 |          |            |           |
| Mn1-O1     | 2.164(3) | Mn1-N1     | 2.280(3)  |
| Mn1-O3     | 2.110(3) | Mn1-N2     | 2.335(3)  |
| Mn1-O5     | 2.073(3) | Mn1-N3     | 2.2933(4) |
| Mn2-O2     | 2.141(3) | Mn2-N4     | 2.277(3)  |
| Mn2-O4     | 2.115(3) | Mn2-N5     | 2.361(3)  |
| Mn2-O6     | 2.091(3) | Mn2-N6     | 2.284(3)  |
| Mn2-O4-C40 | 140.2(3) | Mn2-O6-C42 | 144.6(3)  |
| Mn1-O3-C40 | 147.9(3) | Mn1-O5-C42 | 147.0(3)  |
| Compound 4 |          |            |           |
| Cu1-O1     | 2.219(5) | Cu1-N1c    | 2.059(5)  |
| Cu1-N2     | 1.999(5) | Cu1-N3     | 2.002(5)  |
| Cu1-N7     | 1.999(5) | Cu1-N22b   | 2.650(6)  |
| Cu2-O2     | 2.538(4) | Cu2-N4     | 2.033(7)  |
| Cu2-N5     | 2.006(5) | Cu2-N6     | 2.008(5)  |
| Cu2-N10    | 1.957(6) | Cu2-N21    | 2.527(5)  |
| Cu3-O3     | 2.658(4) | Cu3-N12    | 2.584(5)  |
| Cu3-N13    | 2.016(6) | Cu3-N14    | 2.003(7)  |
| Cu3-N15    | 2.004(7) | Cu3-N19    | 1.942(6)  |
| Cu4-O4     | 2.214(4) | Cu4-N7a    | 2.725(6)  |
| Cu4-N16    | 2.045(5) | Cu4-N17    | 2.002(5)  |
| Cu4-N18    | 2.018(5) | Cu4-N22    | 1.995(5)  |
| N7-N8      | 1.203(8) | N8-N9      | 1.164(8)  |
| N10-N11    | 1.205(8) | N11-N12    | 1.166(9)  |
| N19-N20    | 1.187(9) | N20-N21    | 1.137(7)  |



|                   |           |             |            |
|-------------------|-----------|-------------|------------|
| N22-N23           | 1.175(8)  | N23-N24     | 1.165(8)   |
| N10-N11-N12       | 176.2(7)  | N7-N8-N9    | 176.0(6)   |
| N19-N20-N21       | 175.3(7)  | N22-N23-N24 | 175.0(6)   |
| <b>Compound 5</b> |           |             |            |
| Zn1-O1            | 2.141(4)  | Zn1-N1      | 2.110(5)   |
| Zn1-O5            | 2.231(10) | Zn1-N2      | 2.210(5)   |
| Zn1-O3            | 2.032(4)  | Zn1-N3      | 2.105(5)   |
| Zn2-O2            | 1.986(4)  | Zn2-N4      | 2.089(4)   |
| Zn2-O4            | 2.019(4)  | Zn2-N5      | 2.241(5)   |
| Zn2-N6            | 2.084(6)  | Zn1-O5A     | 1.94(4)    |
| Zn1-O3-C40        | 141.0(4)  | Zn2-O4-C40  | 120.6(4)   |
| <b>Compound 6</b> |           |             |            |
| Cd1-O1            | 2.401(2)  | Cd1-O3      | 2.626(2)   |
| Cd1-O4            | 2.332(2)  | Cd1-O5      | 2.273(2)   |
| Cd1-N2            | 2.478(2)  | Cd1-N3      | 2.381(3)   |
| Cd1-N4            | 2.330(3)  | Cd2-O2      | 2.2734(19) |
| Cd2-O3            | 2.316(2)  | Cd2-O6      | 2.296(2)   |
| Cd2-O8            | 2.698(2)  | Cd2-N5      | 2.542(3)   |
| Cd2-N6            | 2.352(3)  | Cd2-N7      | 2.393(3)   |
| Cd1-O3-C40        | 86.35(17) | Cd1-O4-C40  | 100.83(18) |
| Cd2-O6-42C        | 103.1(2)  | Cd2-O8-C42  | 83.79(18)  |
| Cd1-O3-Cd2        | 135.10(9) | O3-Cd1-O4   | 52.25(7)   |
| O6-Cd2-O8         | 51.46(7)  |             |            |

Symmetry codes for 4: (a)  $-1/2+x, 3/2-y, 1/2+z$ ; (b)  $1/2+x, 3/2-y, -1/2+z$ .

**Table S2** Possible hydrogen bonds

| D-H...A*          | Symmetry of A        | D...A (Å) | D-H..A (°) |
|-------------------|----------------------|-----------|------------|
| <b>Compound 1</b> |                      |           |            |
| O1-H1...O2        |                      | 2.398(3)  | 172        |
| <b>Compound 4</b> |                      |           |            |
| O11-H11A...O11    | [-x,1-y,1-z]         | 2.908(10) | 126        |
| O11-H11B...O5     |                      | 2.974(10) | 130        |
| O12-H12A...O6     |                      | 3.054(12) | 149        |
| O12-H12A...O7     |                      | 3.175(9)  | 157        |
| O12-H12B...O8     |                      | 2.871(10) | 172        |
| O13-H13A...O9     |                      | 2.898(9)  | 148        |
| O13-H13B...O12    |                      | 3.031(9)  | 143        |
| O14-H14A...O10    |                      | 2.776(9)  | 168        |
| O14-H14B...N9     | [1/2-x,-1/2+y,1/2-z] | 3.093(10) | 154        |
| <b>Compound 5</b> |                      |           |            |
| O2-H2...O1        |                      | 2.460(6)  | 170        |
| O5-H5A...F4       | [1-x,1-y,1-z]        | 2.857(7)  | 154        |
| O5-H5B..O6        |                      | 2.700(9)  | 140        |
| <b>Compound 6</b> |                      |           |            |
| O1-H2...O2        |                      | 2.407(3)  | 172        |
| O5-H5A...O7       |                      | 2.680(4)  | 154        |
| O5-H5B...O8       |                      | 2.757(3)  | 165        |
| O7-H7C...O8       | [1-x,1-y,1-z]        | 2.802(4)  | 166        |
| O7-H7D...F3       |                      | 2.934(4)  | 164        |

**Table S3** Non-covalent ring-ring interactions.

|                   | ring(A)             | ring(B)                     | Cg(A)...Cg(B) (Å) |
|-------------------|---------------------|-----------------------------|-------------------|
| Compound <b>1</b> | Cg(C1-C6)           | Cg(C1-C6)[-x,1-y,1-z]       | 3.690(2)          |
|                   | Cg(N2,C16-C20)      | Cg(N2,C16-C20)[1-x,1-y,2-z] | 3.522(2)          |
|                   |                     |                             |                   |
| Compound <b>5</b> | Cg(N4,C010,C34-C37) | Cg(N6,C28-C32)[-x,1-y,1-z]  | 3.636(4)          |
|                   | Cg(C14-C19)         | Cg(C14-C19)[1-x,1-y,-z]     | 3.750(3)          |

Cg = center of gravity of ring

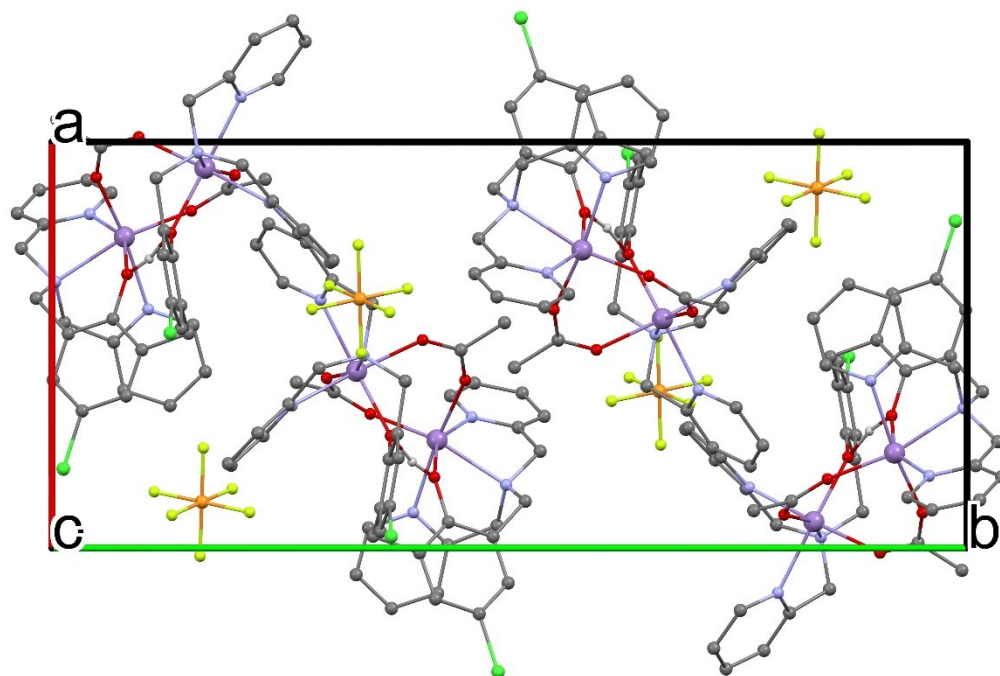

Fig. S10. Packing plot of 1.

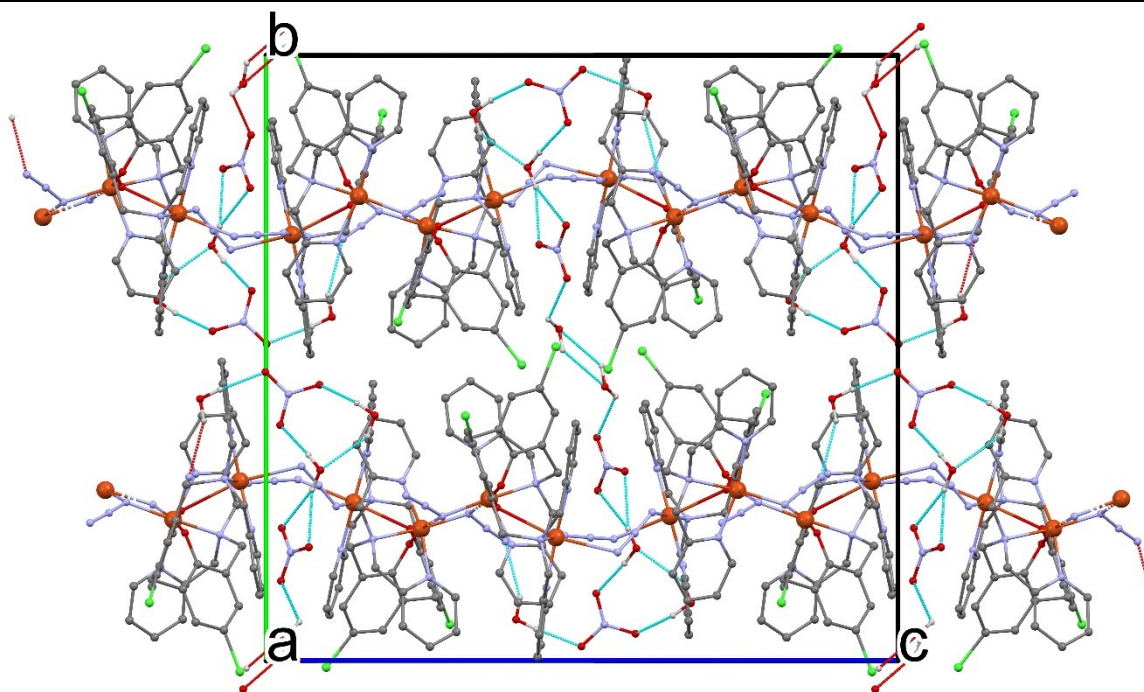

Fig. S11 Packing plot of 4.

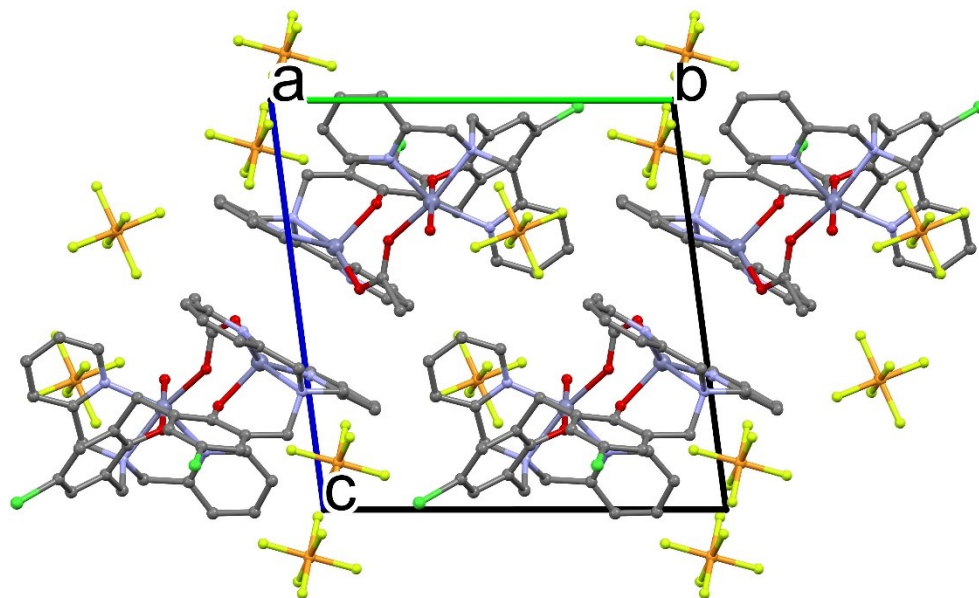

**Fig. S12** Packing plot of **5**. Disordered parts with minor occupancy omitted for clarity.

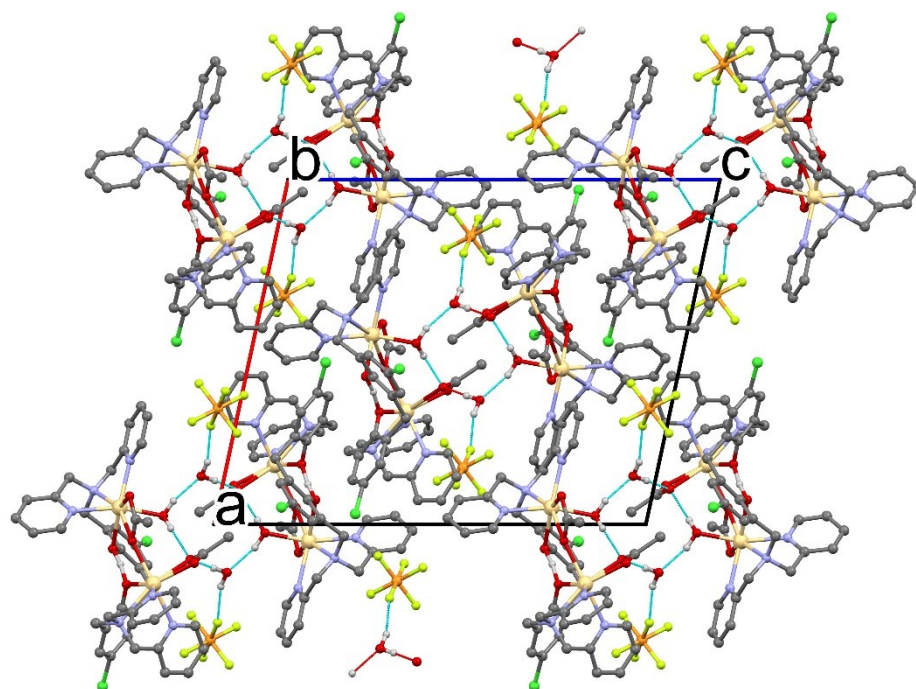

**Fig. S13** Packing plot of **6**.

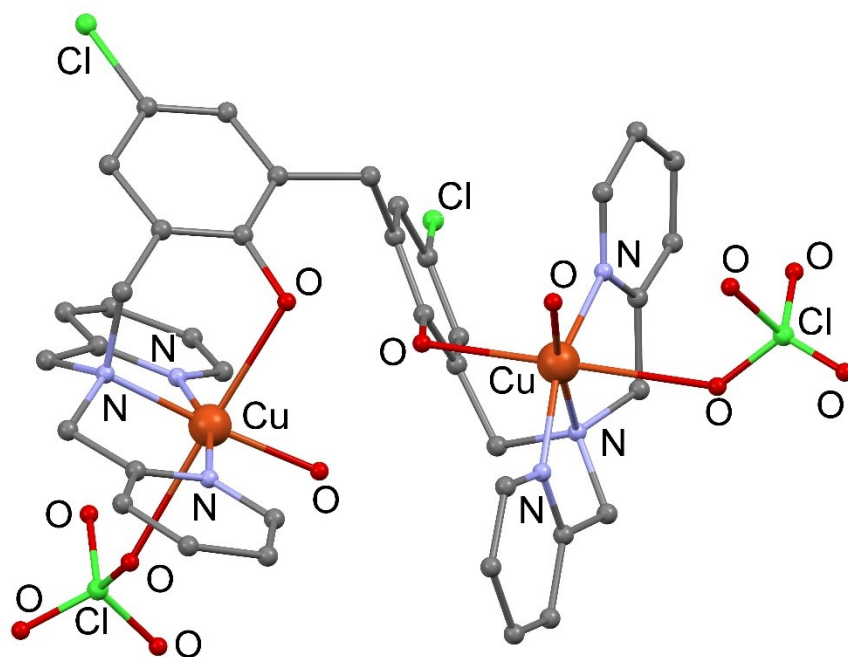

**Fig. S14a** Perspective view of Cu1-Cu2 dimeric unit in **2**.

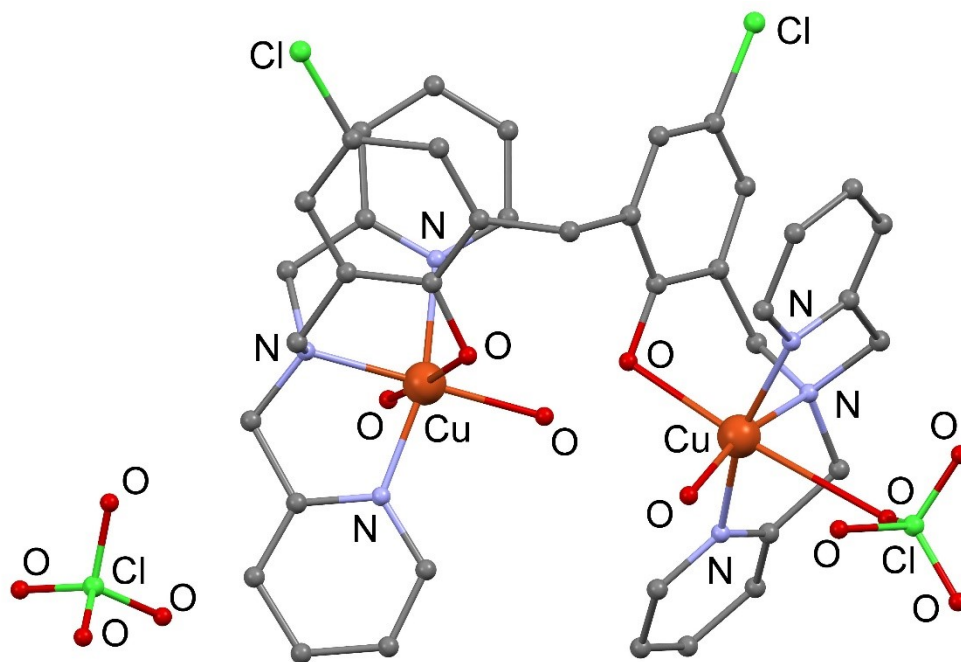

**Fig. S14b** Perspective view of Cu3-Cu4 dimeric unit in **2**.

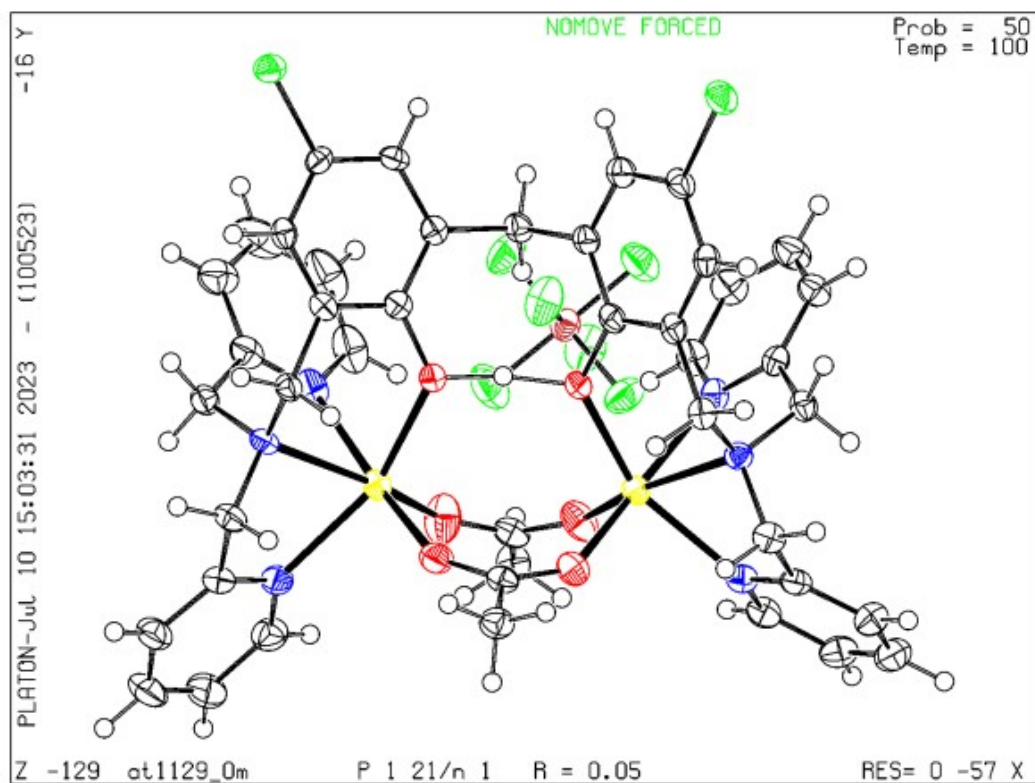

Fig. S15 ORTEP plot of 1.

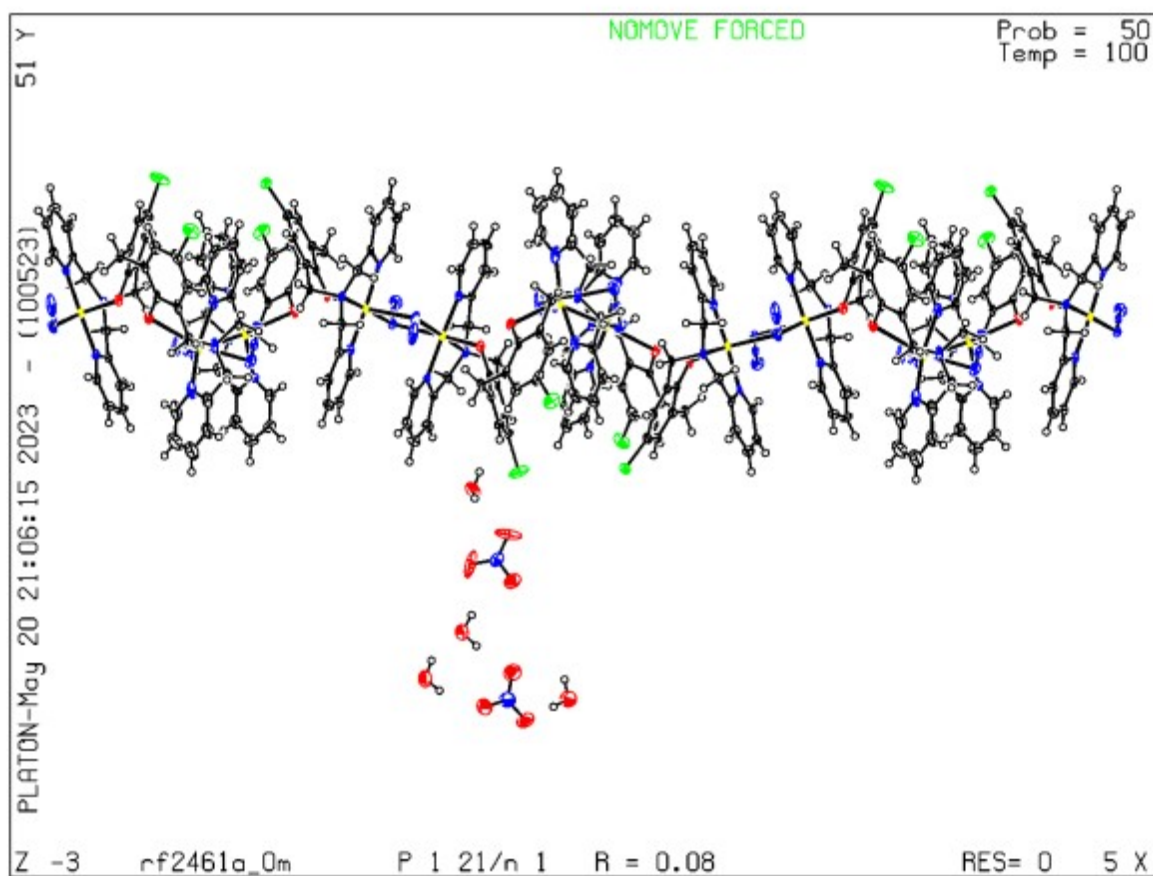

Fig. S16 ORTEP plot of 4.



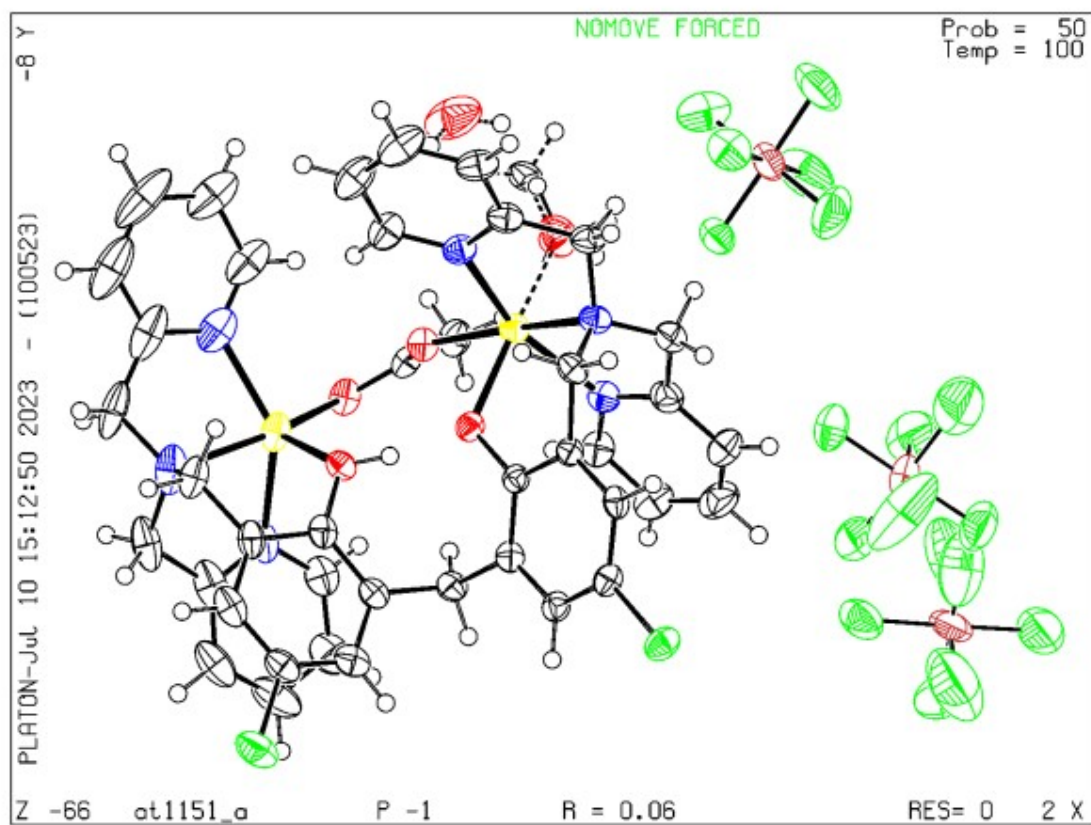

Fig. S17 ORTEP plot of 5.

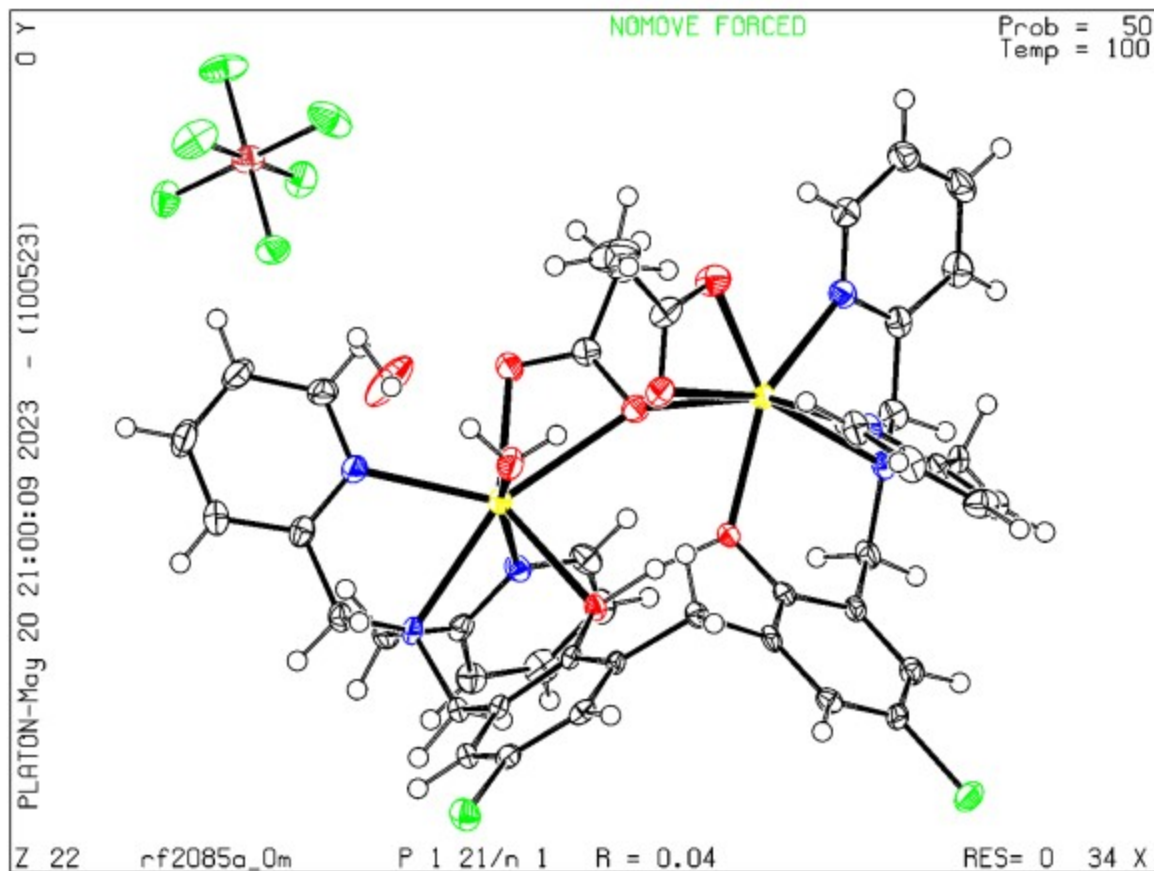

Fig. S18 ORTEP plot of 6.
